# Supplementary material for: The metabolic regulation of Fuzhuan brick tea in high-fat diet-induced obese mice and the potential contribution of gut microbiota
Source: Royal Society of Chemistry journal article supplement (doi:10.1039/d1fo02181h), 2021-09-14

(A) Electronic Supplementary Material (ESI) for Food & Function. This journal is © The Royal Society of Chemistry 2021

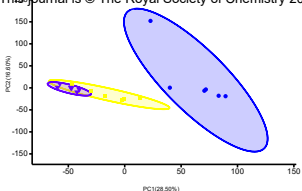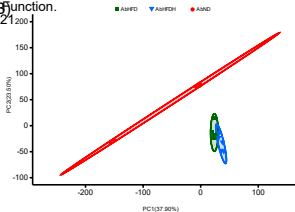

Supplement: d1fo02181h1.pdf [file d1fo02181h1.pdf]
