# Supplementary material for: The metabolic regulation of Fuzhuan brick tea in high-fat diet-induced obese mice and the potential contribution of gut microbiota
Source: Royal Society of Chemistry journal article supplement (doi:10.1039/d1fo02181h), 2021-09-14
Supplement: d1fo02181h2.pdf [file d1fo02181h2.pdf]

## Supplementary Tables

**Supplementary Table 1. The model parameters of OPLS-DA in different comparative groups**

| <b>WTND</b>              | <b>A</b> | <b>r2x</b> | <b>r2x(cum)</b> | <b>r2y</b> | <b>r2y(cum)</b> | <b>q2</b> | <b>q2(cum)</b> |
|--------------------------|----------|------------|-----------------|------------|-----------------|-----------|----------------|
| <b>vs. WTHFD</b>         | p1       | 0.254      | 0.254           | 0.961      | 0.961           | 0.833     | 0.833          |
|                          | o1       | 0.191      | 0.444           | 0.028      | 0.028           | 0.0483    | 0.0483         |
|                          | sum      |            | 0.444           |            | 0.989           |           | 0.881          |
| <b>WTHFD vs. WTHFDH</b>  | A        | r2x        | r2x(cum)        | r2y        | r2y(cum)        | q2        | q2(cum)        |
|                          | p1       | 0.339      | 0.339           | 0.967      | 0.967           | 0.878     | 0.878          |
|                          | o1       | 0.195      | 0.534           | 0.022      | 0.022           | 0.0223    | 0.0223         |
|                          | sum      |            | 0.534           |            | 0.989           |           | 0.9            |
| <b>AbND vs. AbHFD</b>    | A        | r2x        | r2x(cum)        | r2y        | r2y(cum)        | q2        | q2(cum)        |
|                          | p1       | 0.31       | 0.31            | 0.915      | 0.915           | 0.836     | 0.836          |
|                          | o1       | 0.371      | 0.682           | 0.0716     | 0.0716          | 0.109     | 0.109          |
|                          | sum      |            | 0.682           |            | 0.987           |           | 0.944          |
| <b>AbHFD vs. AbHFDH</b>  | A        | r2x        | r2x(cum)        | r2y        | r2y(cum)        | q2        | q2(cum)        |
|                          | p1       | 0.208      | 0.208           | 0.891      | 0.891           | 0.697     | 0.697          |
|                          | o1       | 0.208      | 0.416           | 0.103      | 0.103           | 0.0813    | 0.0813         |
|                          | sum      |            | 0.416           |            | 0.994           |           | 0.778          |
| <b>AbND vs. WTND</b>     | A        | r2x        | r2x(cum)        | r2y        | r2y(cum)        | q2        | q2(cum)        |
|                          | p1       | 0.249      | 0.249           | 0.872      | 0.872           | 0.764     | 0.764          |
|                          | o1       | 0.355      | 0.604           | 0.122      | 0.122           | 0.156     | 0.156          |
|                          | sum      |            | 0.604           |            | 0.994           |           | 0.919          |
| <b>AbHFD vs. WTHFD</b>   | A        | r2x        | r2x(cum)        | r2y        | r2y(cum)        | q2        | q2(cum)        |
|                          | p1       | 0.312      | 0.312           | 0.975      | 0.975           | 0.911     | 0.911          |
|                          | o1       | 0.081      | 0.393           | 0.0242     | 0.0242          | 0.0281    | 0.0281         |
|                          | sum      |            | 0.393           |            | 0.999           |           | 0.939          |
| <b>AbHFDH vs. WTHFDH</b> | A        | r2x        | r2x(cum)        | r2y        | r2y(cum)        | q2        | q2(cum)        |
|                          | p1       | 0.317      | 0.317           | 0.983      | 0.983           | 0.897     | 0.897          |
|                          | o1       | 0.105      | 0.421           | 0.0157     | 0.0157          | 0.027     | 0.027          |
|                          | sum      |            | 0.421           |            | 0.999           |           | 0.924          |

**Supplementary Table 2. Relative abundance of OTUs showing differences between HFD and HFD+FBT groups in healthy mice**

| OUT ID                                                              | Relative abundance (%) |       |        | P value*   |             |           | sign |
|---------------------------------------------------------------------|------------------------|-------|--------|------------|-------------|-----------|------|
|                                                                     | WTND                   | WTHFD | WTHFDH | ND         | HFD         | HFDH      |      |
|                                                                     |                        |       |        | vs.<br>HFD | vs.<br>HFDH | vs.<br>ND |      |
| OTU12 // Parabacteroides_goldsteinii                                | 7.53                   | 1.66  | 1.97   | 0.0390     | 1.0000      | 0.0520    | ☆    |
| OTU593 // uncultured_bacterium_g_norank_f_Bacteroidales_S24-7_group | 21.77                  | 0.35  | 0.38   | 0.0090     | 1.0000      | 0.0120    |      |
| OTU594 // uncultured_bacterium_g_norank_f_Bacteroidales_S24-7_group | 0.84                   | 0.01  | 0.01   | 0.0080     | 1.0000      | 0.0130    |      |
| OTU600 // Lactobacillus_johnsonii                                   | 0.83                   | 0.41  | 1.55   | /          | /           | /         |      |
| OTU420 // unclassified_f_Erysipelotrichaceae                        | 0.59                   | 0.10  | 0.49   | /          | /           | /         |      |
| OTU276 // Bacteroides_thetaiotaomicron                              | 4.90                   | 12.88 | 13.01  | 0.0170     | 1.0000      | 0.0280    |      |
| OTU415 // uncultured_bacterium_g_Lachnospiraceae_UCG-006            | 0.18                   | 0.79  | 0.40   | 0.0050     | 0.4790      | 0.2510    | ☆    |
| OTU401 // unclassified_g_[Eubacterium]_nodatum_group                | 0.08                   | 0.90  | 0.50   | 0.0110     | 1.0000      | 0.0450    |      |
| OTU435 // unclassified_g_Lactobacillus                              | 0.04                   | 0.60  | 0.12   | 0.0090     | 0.5550      | 0.2970    | ☆    |
| OTU270 // [Clostridium]_leptum_g_Ruminococcaceae_UCG-009            | 0.43                   | 1.94  | 1.20   | 0.0030     | 0.4790      | 0.1750    | ☆    |
| OTU443 // uncultured_bacterium_g_Intestinimonas                     | 0.18                   | 0.98  | 0.56   | 0.0040     | 0.5830      | 0.1550    | ☆    |
| OTU461 // uncultured_bacterium_g_norank_f_Lachnospiraceae           | 0.02                   | 0.94  | 0.49   | 0.0020     | 0.7000      | 0.0910    |      |
| OTU307 // unclassified_f_Ruminococcaceae                            | 0.12                   | 0.61  | 0.46   | 0.0070     | 1.0000      | 0.0240    |      |
| OTU442 // unclassified_g_Oscillibacter                              | 0.08                   | 0.49  | 0.30   | 0.0020     | 0.9130      | 0.0600    |      |
| OTU249 // uncultured_bacterium_g_Intestinimonas                     | 0.30                   | 0.45  | 0.42   | /          | /           | /         |      |
| OTU465 // uncultured_bacterium_g_Lachnospiraceae_FCS020_group       | 0.22                   | 0.35  | 0.24   | /          | /           | /         |      |
| OTU416 // unclassified_g_Ruminiclostridium_5                        | 0.21                   | 0.93  | 0.11   | 0.1200     | 0.0090      | 1.0000    | ☆    |
| OTU494 // Anaerotruncus_sp_G3_2012_                                 | 0.22                   | 0.72  | 0.15   | 0.1200     | 0.0090      | 1.0000    | ☆    |
| OTU391 // unclassified_g_Blautia                                    | 0.35                   | 3.59  | 0.64   | /          | /           | /         |      |
| OTU366 // unclassified_g_Desulfovibrio                              | 0.00                   | 0.17  | 0.00   | /          | /           | /         |      |

|                                                                                     |      |      |       |        |        |        |   |
|-------------------------------------------------------------------------------------|------|------|-------|--------|--------|--------|---|
| OTU447 // uncultured_organism_g__Ruminococcaceae_UCG-010                            | 0.08 | 0.23 | 0.34  | /      | /      | /      |   |
| OTU438 // unclassified_f__Ruminococcaceae                                           | 0.09 | 0.07 | 0.21  | /      | /      | /      |   |
| OTU121 // uncultured_bacterium_g__Lachnospiraceae_NK4A136_group                     | 0.27 | 0.11 | 0.68  | 1.0000 | 0.0090 | 0.1190 | ☆ |
| OTU578 // unclassified_g__Alistipes                                                 | 0.15 | 0.06 | 0.32  | 1.0000 | 0.0360 | 0.3390 | ☆ |
| OTU572 // uncultured_bacterium_g__norank_f__Lachnospiraceae                         | 0.44 | 0.09 | 0.72  | /      | /      | /      |   |
| OTU545 // uncultured_organism_g__[Eubacterium]_ventriosum_group                     | 0.05 | 0.12 | 0.16  | 1.0000 | 0.0690 | 0.1540 |   |
| OTU454 // uncultured_bacterium_g__norank_f__Bacteroidales_S24-7_group               | 0.40 | 0.22 | 1.15  | 0.9130 | 0.0020 | 0.0600 | ☆ |
| OTU323 // uncultured_Bacteroidales_bacterium_g__norank_f__Bacteroidales_S24-7_group | 0.00 | 1.25 | 12.01 | 1.0000 | 0.0050 | 0.0100 |   |
| OTU389 // uncultured_bacterium_g__Clostridium_sensu_stricto_1                       | 0.03 | 0.02 | 0.30  | 1.0000 | 0.0140 | 0.0270 | ☆ |
| OTU369 // uncultured_bacterium_g__norank_f__Lachnospiraceae                         | 0.10 | 0.59 | 0.88  | 0.0910 | 0.7020 | 0.0025 |   |
| OTU577 // unclassified_g__Lachnospiraceae_NK4A136_group                             | 0.09 | 0.37 | 0.99  | 0.0980 | 1.0000 | 0.0110 |   |
| OTU529 // unclassified_f__Lachnospiraceae                                           | 0.28 | 1.61 | 1.95  | 0.0330 | 1.0000 | 0.0030 |   |
| OTU274 // unclassified_g__norank_f__Lachnospiraceae                                 | 0.11 | 1.18 | 0.65  | 0.1050 | 1.0000 | 0.0850 |   |
| OTU456 // unclassified_g__norank_f__Clostridiales_vadinBB60_group                   | 0.02 | 0.11 | 0.14  | 0.2460 | 0.9440 | 0.0180 |   |
| OTU412 // unclassified_f__Lachnospiraceae                                           | 0.02 | 0.03 | 0.71  | 1.0000 | 0.0550 | 0.0050 |   |
| OTU557 // unclassified_g__norank_f__Lachnospiraceae                                 | 0.09 | 0.10 | 0.24  | /      | /      | /      |   |
| OTU320 // uncultured_bacterium_g__Lachnospiraceae_NK4A136_group                     | 0.01 | 0.01 | 2.57  | 1.0000 | 0.0270 | 0.0020 | ☆ |
| OTU352 // unclassified_g__norank_f__Clostridiales_vadinBB60_group                   | 0.04 | 0.06 | 0.27  | /      | /      | /      |   |

Note: The OTUs significantly increased in group WTHFDH compared to WTHFD or significantly decreased in group WTHFD compared to WTND are shown in red; On the contrary, the OTUs are shown in green; The OTUs significantly increased in group WTHFDH, in which significantly decreased in group WTHFD are shown signed with "★", while those insignificantly decreased in group WTHFD yet insignificantly changed in group WTHFDH compared to WTND are signed with "☆". On the contrary, the OTUs are shown in green with "★" or green with "☆". Other OTUs that had no significant changes are shown in grey. \**P* values were calculated using Kruskal–Wallis test with Bonferroni's correction. Significant *P* values (<0.05) are shown in red, yellow, or green.

**Supplementary Table 3. Relative abundance of metabolites showing differences between HFD and HFD+FBT groups in healthy mice**

| Metabolites                                         | Relative abundance (%) |       |        | P value*   |              |              | HFD vs. ND    |       | HFDH vs. HFD |       |             |
|-----------------------------------------------------|------------------------|-------|--------|------------|--------------|--------------|---------------|-------|--------------|-------|-------------|
|                                                     | WTND                   | WTHFD | WTHFDH | HFD vs. ND | HFDH vs. HFD | HFDH vs. HFD | Effect of FBT | Trend | Fold change  | Trend | Fold change |
| LysoPC(P-16:0)                                      | 0.61                   | 0.58  | 0.47   | /          | /            | /            |               | ↓     | 0.96         | ↓     | 0.81        |
| Bis(2-ethylhexyl) phthalate                         | 0.46                   | 0.35  | 0.19   | 0.703      | 0.281        | 0.012        |               | ↓     | 0.75         | ↓     | 0.55        |
| 10,11-dihydro-20-trihydroxy-leukotriene B4          | 3.61                   | 1.46  | 0.46   | 0.351      | 0.175        | 0.002        |               | ↓     | 0.40         | ↓     | 0.32        |
| Aliskiren                                           | 2.79                   | 1.65  | 0.92   | 0.390      | 0.136        | 0.001        |               | ↓     | 0.59         | ↓     | 0.56        |
| LysoPE(22:6(4Z,7Z,10Z,13Z,16Z,19Z)/0:0)             | 7.30                   | 7.25  | 5.44   | 1.000      | 0.092        | 0.080        |               | ↓     | 0.99         | ↓     | 0.75        |
| LysoPC(22:5(4Z,7Z,10Z,13Z,16Z))                     | 6.19                   | 6.10  | 4.91   | /          | /            | /            |               | ↓     | 0.98         | ↓     | 0.81        |
| PE(18:0/0:0)                                        | 5.05                   | 4.99  | 3.89   | 1.000      | 0.120        | 0.039        |               | ↓     | 0.99         | ↓     | 0.78        |
| LysoPE(18:0/0:0)                                    | 3.54                   | 6.05  | 5.41   | /          | /            | /            |               | ↑     | 1.71         | ↓     | 0.89        |
| Oleamide                                            | 0.52                   | 0.60  | 0.14   | 1.000      | 0.011        | 0.017        | ☆             | ↑     | 1.15         | ↓*    | 0.23        |
| Janthitrem C                                        | 1.09                   | 0.71  | 0.89   | /          | /            | /            |               | ↓     | 0.65         | ↑     | 1.26        |
| PC(22:6(4Z,7Z,10Z,13Z,16Z,19Z)/18:2(9Z,12Z))        | 0.63                   | 0.39  | 0.58   | 0.013      | 0.027        | 0.787        | ★             | ↓*    | 0.61         | ↑*    | 1.49        |
| PC(20:3(8Z,11Z,14Z)/16:0)                           | 0.71                   | 0.50  | 0.64   | 0.028      | 0.223        | 1.000        | ☆             | ↓*    | 0.71         | ↑     | 1.27        |
| PC(22:6(4Z,7Z,10Z,13Z,16Z,19Z)/20:4(5Z,8Z,11Z,14Z)) | 0.36                   | 0.16  | 0.27   | 0.021      | 0.198        | 1.000        | ☆             | ↓*    | 0.44         | ↑     | 1.68        |
| LysoPC(22:5(7Z,10Z,13Z,16Z,19Z))                    | 1.38                   | 0.88  | 1.44   | /          | /            | /            |               | ↓     | 0.64         | ↑     | 1.64        |
| LysoPC(20:3(5Z,8Z,11Z))                             | 13.22                  | 10.06 | 13.41  | 0.092      | 0.052        | 1.000        |               | ↓     | 0.76         | ↑     | 1.33        |
| Lactosylceramide (d18:1/12:0)                       | 1.15                   | 0.95  | 1.26   | 0.175      | 0.060        | 1.000        |               | ↓     | 0.83         | ↑     | 1.32        |
| LysoPC(22:1(13Z))                                   | 0.30                   | 0.08  | 0.07   | 0.024      | 1.000        | 0.004        |               | ↓*    | 0.26         | ↓     | 0.93        |
| LysoPE(20:1(11Z)/0:0)                               | 3.15                   | 1.58  | 1.60   | /          | /            | /            |               | ↓     | 0.50         | ↑     | 1.01        |
| LysoPC(18:1(11Z))                                   | 10.85                  | 7.19  | 7.36   | /          | /            | /            |               | ↓     | 0.66         | ↑     | 1.02        |
| 1-Heptadecanoylglycerophosphoethanolamine           | 0.67                   | 0.34  | 0.38   | 0.015      | 0.838        | 0.251        | ☆             | ↓*    | 0.51         | ↑     | 1.11        |

|                                                                      |       |       |       |       |       |       |   |      |       |     |      |
|----------------------------------------------------------------------|-------|-------|-------|-------|-------|-------|---|------|-------|-----|------|
| LysoPC(16:1(9Z))                                                     | 14.85 | 4.82  | 4.92  | 0.006 | 1.000 | 0.017 |   | ↓**  | 0.32  | ↑   | 1.02 |
| PC(20:2(11Z,14Z)/14:1(9Z))                                           | 1.05  | 0.47  | 0.52  | 0.003 | 1.000 | 0.033 |   | ↓**  | 0.45  | ↑   | 1.09 |
| PC(20:4(5Z,8Z,11Z,14Z)/16:1(9Z))                                     | 0.81  | 0.36  | 0.42  | 0.002 | 0.768 | 0.069 | ☆ | ↓**  | 0.44  | ↑   | 1.17 |
| LysoPC(20:1(11Z))                                                    | 1.07  | 0.40  | 0.43  | 0.002 | 0.991 | 0.045 |   | ↓**  | 0.38  | ↑   | 1.07 |
| 6-(4-ethyl-3-hydroxyphenoxy)-3,4,5-trihydroxyoxane-2-carboxylic acid | 0.28  | 0.06  | 0.13  | 0.000 | 0.136 | 0.198 | ☆ | ↓*** | 0.22  | ↑   | 2.09 |
| PC(22:6(4Z,7Z,10Z,13Z,16Z,19Z)/16:1(9Z))                             | 0.67  | 0.25  | 0.33  | 0.003 | 0.479 | 0.175 | ☆ | ↓**  | 0.37  | ↑   | 1.33 |
| PC(22:6(4Z,7Z,10Z,13Z,16Z,19Z)/18:1(9Z))                             | 0.35  | 0.13  | 0.17  | 0.001 | 0.251 | 0.175 | ☆ | ↓**  | 0.36  | ↑   | 1.33 |
| LysoPC(20:4(5Z,8Z,11Z,14Z))                                          | 28.24 | 26.45 | 31.41 | 0.641 | 0.005 | 0.175 | ☆ | ↓    | 0.94  | ↑** | 1.19 |
| LysoPC(20:4(8Z,11Z,14Z,17Z))                                         | 3.65  | 4.15  | 5.78  | 1.000 | 0.060 | 0.007 |   | ↑    | 1.14  | ↑   | 1.39 |
| PE(18:1(9Z)/0:0)                                                     | 3.54  | 6.05  | 5.41  | 0.006 | 1.000 | 0.069 | ☆ | ↑**  | 1.71  | ↓   | 0.89 |
| 1-Linoleoylglycerophosphocholine                                     | 47.08 | 52.04 | 52.13 | 0.092 | 1.000 | 0.033 |   | ↑    | 1.11  | ↑   | 1.00 |
| 3a,7a-Dihydroxy-5b-cholestane                                        | 0.36  | 0.62  | 0.64  | 0.092 | 1.000 | 0.033 |   | ↑    | 1.73  | ↑   | 1.03 |
| 1-Hydroxy-2,12,15-heneicosatrien-4-one                               | 0.07  | 0.09  | 0.18  | 0.991 | 0.314 | 0.028 |   | ↑    | 1.38  | ↑   | 1.98 |
| Asn Lys Ala Val Gly                                                  | 0.12  | 0.50  | 0.54  | 0.039 | 1.000 | 0.002 |   | ↑*   | 4.14  | ↑   | 1.09 |
| Cytochalasin Ppho                                                    | 0.02  | 0.34  | 0.36  | 0.028 | 1.000 | 0.004 |   | ↑*** | 22.13 | ↑   | 1.08 |
| 3-Indolepropionic acid                                               | 0.03  | 0.02  | 0.04  | 0.390 | 0.002 | 0.198 | ☆ | ↓    | 0.69  | ↑** | 1.83 |

Note: Trend ↑, ↓ denote that the metabolite content increased and decreased, respectively. \* denotes that the difference is significant ( $p < 0.05$ ), \*\*denotes that the difference is highly significant ( $p < 0.01$ ), and \*\*\* denotes that the difference is highly significant ( $p < 0.001$ ). The metabolites significantly increased in group WTHFDH or significantly decreased in group WTHFD, in which different changes of metabolites exist in WTHFDH and WTDN groups compared with group WTHFD, are shown in red; On the contrary, the metabolites are shown in green; The metabolites significantly increased in group WTHFDH while significantly decreased in group WTHFD are shown in red with "★". On the contrary, the metabolites are shown in green with "★". The metabolites shown in red or green towards or beyond the levels in group WTND are signed with "☆". Other metabolites that had no significant changes are shown in grey. \**P* values were calculated using Kruskal–Wallis test with Bonferroni's correction. Significant *P* values ( $< 0.05$ ) are shown in red, yellow, or green.

**Supplementary Table 4. Relative abundance of metabolites showing differences between HFD and HFD+FBT groups in microbiota-depleted mice**

| metabolites                                                          | Relative abundance (%) |       |        | <i>P</i> value** |         |        | Effect of FBT | AbHFD vs. AbND |             | AbHFDH vs. AbHFD |             |
|----------------------------------------------------------------------|------------------------|-------|--------|------------------|---------|--------|---------------|----------------|-------------|------------------|-------------|
|                                                                      | AbND                   | AbHFD | AbHFDH | HFD              | HFDH    | HFDH   |               | Trend          | Fold change | Trend            | Fold change |
|                                                                      |                        |       |        | vs. ND           | vs. HFD | vs. ND |               |                |             |                  |             |
| LysoPC(16:1(9Z))                                                     | 11.39                  | 3.29  | 3.03   | 0.036            | 1.000   | 0.004  | ↓**           | 0.29           | ↓           | 0.92             |             |
| 1-Linoleoylglycerophosphocholine                                     | 41.26                  | 50.42 | 51.24  | 0.026            | 1.000   | 0.019  | ↑*            | 1.22           | ↑           | 1.02             |             |
| LysoPC(18:1(11Z))                                                    | 8.41                   | 6.13  | 6.22   | /                | /       | /      | ↓             | 0.73           | ↑           | 1.02             |             |
| PE(18:1(9Z)/0:0)                                                     | 2.71                   | 3.32  | 4.78   | 1.000            | 0.109   | 0.011  | ↑             | 1.23           | ↑           | 1.44             |             |
| 10,11-dihydro-20-trihydroxy-leukotriene B4                           | 1.58                   | 0.26  | 0.23   | 0.067            | 1.000   | 0.010  | ↓             | 0.16           | ↓           | 0.89             |             |
| LysoPE(20:1(11Z)/0:0)                                                | 2.34                   | 1.25  | 1.18   | /                | /       | /      | ↓             | 0.53           | ↓           | 0.94             |             |
| Aliskiren                                                            | 1.53                   | 1.06  | 0.64   | /                | /       | /      | ↓             | 0.69           | ↓           | 0.60             |             |
| LysoPC(20:1(11Z))                                                    | 0.66                   | 0.30  | 0.25   | /                | /       | /      | ↓             | 0.46           | ↓           | 0.82             |             |
| PC(20:2(11Z,14Z)/14:1(9Z))                                           | 0.89                   | 0.31  | 0.28   | /                | /       | /      | ↓**           | 0.34           | ↓           | 0.90             |             |
| PC(20:4(5Z,8Z,11Z,14Z)/16:1(9Z))                                     | 0.72                   | 0.24  | 0.23   | 0.049            | 1.000   | 0.015  | ↓*            | 0.34           | ↓           | 0.94             |             |
| Asn Lys Ala Val Gly                                                  | 0.08                   | 0.29  | 0.28   | 0.005            | 1.000   | 0.035  | ↓***          | 3.67           | ↓           | 0.94             |             |
| PC(22:6(4Z,7Z,10Z,13Z,16Z,19Z)/16:1(9Z))                             | 0.77                   | 0.26  | 0.16   | 1.000            | 0.059   | 0.007  | ↓             | 0.33           | ↓           | 0.64             |             |
| Cytochalasin Ppho                                                    | 0.01                   | 0.18  | 0.16   | 0.006            | 1.000   | 0.029  | ↑***          | 25.13          | ↓           | 0.86             |             |
| 1-Heptadecanoylglycerophosphoethanolamine                            | 0.54                   | 0.26  | 0.25   | /                | /       | /      | ↓             | 0.48           | ↓           | 0.96             |             |
| 6-(4-ethyl-3-hydroxyphenoxy)-3,4,5-trihydroxyoxane-2-carboxylic acid | 0.18                   | 0.18  | 0.25   | /                | /       | /      | ↑             | 1.04           | ↑           | 1.39             |             |
| PC(22:6(4Z,7Z,10Z,13Z,16Z,19Z)/18:1(9Z))                             | 0.28                   | 0.13  | 0.12   | /                | /       | /      | ↓             | 0.47           | ↓           | 0.87             |             |
| LysoPC(22:1(13Z))                                                    | 0.18                   | 0.05  | 0.04   | /                | /       | /      | ↓*            | 0.31           | ↓           | 0.83             |             |
| PC(22:6(4Z,7Z,10Z,13Z,16Z,19Z)/18:2(9Z,12Z))                         | 0.67                   | 0.40  | 0.29   | /                | /       | /      | ↓             | 0.59           | ↓           | 0.73             |             |
| 3a,7a-Dihydroxy-5b-cholestane                                        | 0.27                   | 0.97  | 0.96   | 0.013            | 1.000   | 0.023  | ↑*            | 3.57           | ↓           | 0.99             |             |

|                                                     |       |       |       |       |       |       |  |    |      |    |      |
|-----------------------------------------------------|-------|-------|-------|-------|-------|-------|--|----|------|----|------|
| LysoPC(20:4(5Z,8Z,11Z,14Z))                         | 27.63 | 31.12 | 29.08 | /     | /     | /     |  | ↑  | 1.13 | ↓  | 0.93 |
| LysoPC(20:3(5Z,8Z,11Z))                             | 12.73 | 11.08 | 9.51  | /     | /     | /     |  | ↓  | 0.87 | ↓  | 0.86 |
| LysoPE(22:6(4Z,7Z,10Z,13Z,16Z,19Z)/0:0)             | 4.61  | 6.12  | 5.23  | /     | /     | /     |  | ↑  | 1.33 | ↓  | 0.85 |
| LysoPC(20:4(8Z,11Z,14Z,17Z))                        | 3.77  | 5.17  | 5.03  | /     | /     | /     |  | ↑  | 1.37 | ↓  | 0.97 |
| LysoPC(22:5(4Z,7Z,10Z,13Z,16Z))                     | 4.11  | 4.42  | 4.64  | /     | /     | /     |  | ↑  | 1.07 | ↑  | 1.05 |
| LysoPE(18:0/0:0)                                    | 4.11  | 4.42  | 4.64  | /     | /     | /     |  | ↑  | 1.07 | ↑  | 1.05 |
| PE(18:0/0:0)                                        | 3.96  | 3.83  | 4.16  | /     | /     | /     |  | ↓  | 0.97 | ↑  | 1.09 |
| LysoPC(22:5(7Z,10Z,13Z,16Z,19Z))                    | 1.66  | 1.46  | 1.19  | /     | /     | /     |  | ↓  | 0.88 | ↓  | 0.81 |
| Oleamide                                            | 2.48  | 1.61  | 2.26  | /     | /     | /     |  | ↓  | 0.65 | ↑  | 1.40 |
| Lactosylceramide (d18:1/12:0)                       | 1.14  | 0.98  | 0.82  | /     | /     | /     |  | ↓  | 0.87 | ↓  | 0.83 |
| Janthitrem C                                        | 1.40  | 1.28  | 1.03  | /     | /     | /     |  | ↓  | 0.92 | ↓  | 0.80 |
| Bis(2-ethylhexyl) phthalate                         | 1.28  | 0.49  | 0.46  | 0.026 | 1.000 | 0.019 |  | ↓* | 0.38 | ↓* | 0.95 |
| PC(20:3(8Z,11Z,14Z)/16:0)                           | 0.71  | 0.44  | 0.42  | /     | /     | /     |  | ↓  | 0.63 | ↓  | 0.95 |
| PC(22:6(4Z,7Z,10Z,13Z,16Z,19Z)/20:4(5Z,8Z,11Z,14Z)) | 0.42  | 0.19  | 0.12  | /     | /     | /     |  | ↓  | 0.45 | ↓  | 0.62 |
| LysoPC(P-16:0)                                      | 0.37  | 0.41  | 0.42  | /     | /     | /     |  | ↑  | 1.09 | ↑  | 1.03 |
| 1-Hydroxy-2,12,15-heneicosatrien-4-one              | 0.06  | 0.27  | 0.33  | 0.026 | 1.000 | 0.006 |  | ↑* | 4.29 | ↑  | 1.21 |
| 3-Indolepropionic acid                              | 0.00  | 0.00  | 0.00  | 1.000 | 0.021 | 0.062 |  | ↑  | 1.13 | ↑* | 1.79 |

Note: Trend ↑, ↓ denote that the metabolite content increased and decreased, respectively. \* denotes that the difference is significant ( $p < 0.05$ ), \*\*denotes that the difference is highly significant ( $p < 0.01$ ), and \*\*\* denotes that the difference is highly significant ( $p < 0.001$ ). The metabolites significantly increased in group WTHFDH or significantly decreased in group WTHFD, in which different changes of metabolites exist in WTHFDH and WTDN groups compared with group WTHFD, are shown in red; On the contrary, the metabolites are shown in green; The metabolites significantly increased in group WTHFDH while significantly decreased in group WTHFD are shown in red with "★". On the contrary, the metabolites are shown in green with "★". The metabolites shown in red or green towards or beyond the levels in group WTND are signed with "☆". Other metabolites that had no significant changes are shown in grey. \**P* values were calculated using Kruskal–Wallis test with Bonferroni's correction. Significant *P* values ( $< 0.05$ ) are shown in red, yellow, or green.

|                            | AbND | AbHFD | AbHFDH | WTND | WTHFD | WTHFDH | lower(Ab vs. WT) |      |      |      |
|----------------------------|------|-------|--------|------|-------|--------|------------------|------|------|------|
| PC(20:2(11Z,14Z)/14:1(9Z)) | 0.89 | 0.31  | 0.28   | 1.05 | 0.47  | 0.52   | 0.15             | 0.35 | 0.46 | 0.32 |
| LysoPC(20:1(11Z))          | 0.66 | 0.30  | 0.25   | 1.07 | 0.40  | 0.43   | 0.38             | 0.25 | 0.42 | 0.35 |

|                                           |       |      |      |       |      |      |      |      |      |      |
|-------------------------------------------|-------|------|------|-------|------|------|------|------|------|------|
| 3-Indolepropionic acid                    | 0.00  | 0.00 | 0.00 | 0.03  | 0.02 | 0.04 | 0.96 | 0.94 | 0.94 | 0.94 |
| PC(20:4(5Z,8Z,11Z,14Z)/16:1(9Z))          | 0.72  | 0.24 | 0.23 | 0.81  | 0.36 | 0.42 | 0.11 | 0.32 | 0.46 | 0.30 |
| LysoPE(20:1(11Z)/0:0)                     | 2.34  | 1.25 | 1.18 | 3.15  | 1.58 | 1.60 | 0.26 | 0.21 | 0.26 | 0.24 |
| LysoPC(16:1(9Z))                          | 11.39 | 3.29 | 3.03 | 14.85 | 4.82 | 4.92 | 0.23 | 0.32 | 0.38 | 0.31 |
| 1-Heptadecanoylglycerophosphoethanolamine | 0.54  | 0.26 | 0.25 | 0.67  | 0.34 | 0.38 | 0.20 | 0.26 | 0.35 | 0.27 |

**Supplementary Table 5. Metabolites values involved in glycerophospholipid metabolism showing differences between HFD and HFD+FBT groups in healthy mice and microbiota-depleted mice**

| Metabolites                                 | Average values |       |        | P value* |        | Average values |       |        | P value* |         |
|---------------------------------------------|----------------|-------|--------|----------|--------|----------------|-------|--------|----------|---------|
|                                             | WTND           | WTHFD | WTHFDH | WTHFD    | WTHFDH | AbND           | AbHFD | AbHFDH | AbHFD    | AbHFDH  |
|                                             |                |       |        | vs.      | vs.    |                |       |        | vs.      | vs.     |
|                                             |                |       |        | WTND     | WTHFD  |                |       |        | AbND     | AbHFD   |
| C04230 (1-Acyl-sn-glycero-3-phosphocholine) | 80.52          | 72.35 | 85.67  | 0.3481   | 0.0804 | 77.94          | 81.91 | 74.83  | 0.9463   | 0.8403  |
| C00157 (Phosphatidylcholine)                | 5.937          | 3.548 | 4.392  | 0.0009   | 0.2606 | 5.905          | 3.337 | 2.86   | 0.0916   | 0.9073  |
| C00350 (Phosphatidylethanolamine)           | 4.507          | 4.686 | 4.481  | 0.8626   | 0.8233 | 3.975          | 3.882 | 3.893  | 0.9923   | >0.9999 |

Note: \*P values were calculated using Tukey's HSD test. Significant P values (<0.05) are shown in grey.

**Supplementary Table 6. Primer sequences for qRT-PCR analysis, related to Figures 8**

| Genes          | Forward Primer Sequence | Reverse Primer Sequence |
|----------------|-------------------------|-------------------------|
| <i>AhR</i>     | ACCGGCTGAACACAGAGTTA    | CCATTCAGCGCCATCAAAGA    |
| <i>Cyp11a1</i> | CAGGCTGACTCTGAACTTGC    | AGACCAAGAGCTGATGCAGT    |
| <i>Pemt</i>    | AGCAGAGAACTCGGAAGCTG    | CCAGGAAGTAGGTGGTGTGG    |
| <i>Fasn</i>    | TCGGGTGTGGTGGGTTTGGT    | GGCGTGAGATGTGTTGCTGAGG  |
| <i>β-actin</i> | GCTGTCCCTGTATGCCTCTG    | TGATGTCACGCACGATTTC     |
